# Supplementary material for: An Exploration of Gene-Gene Interactions and Their Effects on Hypertension
Source: PubMed Central journal article supplement (PMC5470022; doi:10.1155/2017/7208318), 2017-05-31
Supplement: 7208318.f1.pdf [file 7208318.f1.pdf]

**Supplementary Figure 1. Quantile-quantile plots of the BOOST test statistic observed for hypertension.** Only interactions with  $p$  values  $\leq 1 \times 10^{-4}$  were obtained due to the extensive numbers of the epistasis tests conducted. In order to compare the observed values to the expected ones, the  $p$  values of all interactions were divided by  $1 \times 10^{-4}$ .

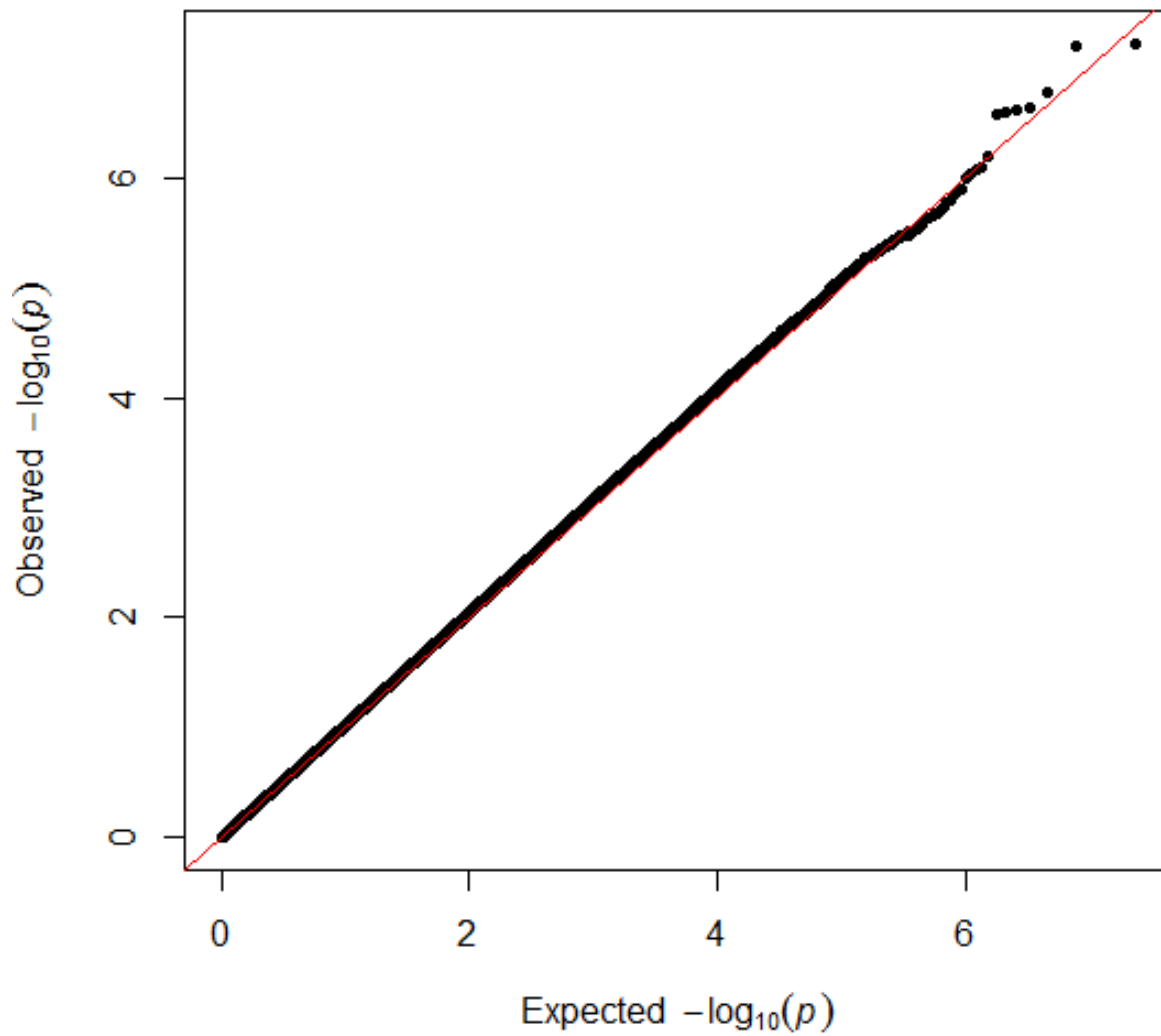

**S1 Table. Summary of Characteristics of Case and Control Groups from the Offspring Sample**

|                  | <b>Case</b>   | <b>Control</b> |
|------------------|---------------|----------------|
| <b>Age</b>       | 49.1(±9.17)   | 46.5(±9.13)    |
| <b>Sex(male)</b> | 53.7%         | 53.7%          |
| <b>BMI</b>       | 25.8(±2.67)   | 25.3 (±2.59)   |
| <b>SBP</b>       | 143.0(±14.60) | 112.7(±7.97)   |
| <b>DBP</b>       | 89.4(±8.98)   | 71.7(±5.48)    |

The numbers presented in the table are the means and standard deviations except for the item of sex. The numbers for sex are the percentage of males in either group. The standard deviations are in the () beside the means.

**S2 Table. Summary of Characteristics of Case and Control Groups from the Original Sample**

|                  | <b>Case</b>   | <b>Control</b> |
|------------------|---------------|----------------|
| <b>Age</b>       | 49.0(±7.63)   | 48.7(±7.40)    |
| <b>Sex(male)</b> | 37.2%         | 37.2%          |
| <b>BMI</b>       | 25.0(±2.72)   | 24.5 (±2.69)   |
| <b>SBP</b>       | 144.0(±12.08) | 114.1(±8.42)   |
| <b>DBP</b>       | 89.3(±8.01)   | 72.5(±5.53)    |

The numbers presented in the table are the means and standard deviations except for the item of sex. The numbers for sex are the percentage of males in either group. The standard deviations are in the () beside the means.

**S3 Table. Genotype Counts for SNP Pairs and Odds Ratios Relative to the Double Major Allele Homozygote Genotype in the Original Sample**

S3a.

|                                               |                  | <i>rs9489622</i>  |                   |           |
|-----------------------------------------------|------------------|-------------------|-------------------|-----------|
|                                               | <i>rs4235144</i> | <i>GG</i>         | <i>GA</i>         | <i>AA</i> |
| Controls                                      | CC               | 0                 | 0                 | 0         |
|                                               | CT               | 0                 | 5                 | 2         |
|                                               | TT               | 74                | 185               | 80        |
| Hypertension                                  | CC               | 0                 | 0                 | 0         |
|                                               | CT               | 2                 | 5                 | 0         |
|                                               | TT               | 82                | 174               | 84        |
| OR <sup>a</sup> relative to TT/AA<br>(95% CI) | CC               | -                 | -                 | -         |
|                                               | CT               | -                 | 0.95(0.266-3.415) | -         |
|                                               | TT               | 1.06(0.681-1.637) | 0.90(0.619-1.296) | 1         |

S3b.

|                                               |                  | <i>rs3913226</i>  |                   |                   |
|-----------------------------------------------|------------------|-------------------|-------------------|-------------------|
|                                               | <i>rs2058798</i> | <i>TT</i>         | <i>TC</i>         | <i>CC</i>         |
| Controls                                      | AA               | 0                 | 0                 | 0                 |
|                                               | AG               | 0                 | 1                 | 6                 |
|                                               | GG               | 12                | 80                | 245               |
| Hypertension                                  | AA               | 0                 | 0                 | 0                 |
|                                               | AG               | 0                 | 0                 | 10                |
|                                               | GG               | 12                | 95                | 217               |
| OR <sup>a</sup> relative to GG/CC<br>(95% CI) | AA               | -                 | -                 | -                 |
|                                               | AG               | -                 | 0.38(0.015-9.285) | 1.88(0.673-5.263) |
|                                               | GG               | 1.13(0.497-2.565) | 1.34(0.946-1.901) | 1                 |

S3c.

|                                               |                  | <i>rs17284390</i> |                   |                   |
|-----------------------------------------------|------------------|-------------------|-------------------|-------------------|
|                                               | <i>rs1909884</i> | <i>GG</i>         | <i>GA</i>         | <i>AA</i>         |
| Controls                                      | AA               | 0                 | 13                | 40                |
|                                               | AG               | 2                 | 32                | 105               |
|                                               | GG               | 4                 | 32                | 118               |
| Hypertension                                  | AA               | 0                 | 13                | 33                |
|                                               | AG               | 0                 | 29                | 120               |
|                                               | GG               | 0                 | 23                | 127               |
| OR <sup>a</sup> relative to<br>GG/AA (95% CI) | AA               | -                 | 0.93(0.414-2.086) | 0.77(0.454-1.295) |
|                                               | AG               | 0.19(0.009-3.912) | 0.84(0.480-1.476) | 1.06(0.739-1.526) |
|                                               | GG               | 0.10(0.006-1.939) | 0.67(0.370-1.207) | 1                 |

S3d.

|                                               | rs17688362 | rs12484954         |                   |                    |
|-----------------------------------------------|------------|--------------------|-------------------|--------------------|
|                                               |            | CC                 | CG                | GG                 |
| Controls                                      | TT         | 4                  | 5                 | 2                  |
|                                               | TG         | 26                 | 50                | 37                 |
|                                               | GG         | 38                 | 93                | 78                 |
| Hypertension                                  | TT         | 1                  | 8                 | 5                  |
|                                               | TG         | 11                 | 44                | 53                 |
|                                               | GG         | 39                 | 101               | 73                 |
| OR <sup>a</sup> relative to<br>GG/GG (95% CI) | TT         | 0.27(0.029-2.446)  | 1.71(0.535-5.465) | 2.67(0.503-14.199) |
|                                               | TG         | 0.45(0.209-0.980)* | 0.94(0.561-1.575) | 1.53(0.903-2.594)  |
|                                               | GG         | 1.10(0.633-1.899)  | 1.16(0.758-1.776) | 1                  |

\*  $P < 0.05$ . <sup>a</sup>OR is odds ratio.
