# Supplementary material for: An Exploration of Gene-Gene Interactions and Their Effects on Hypertension
Source: Int J Genomics. 2017 May 31;2017:7208318. doi: 10.1155/2017/7208318 (PMC5470022; doi:10.1155/2017/7208318)
Supplement: Supplementary file 2 [file 7208318.f2.xlsx]

## Sheet: Sheet1
S1 Dataset. Significant GxG interactions during the discovery stage
All pvalues are the significance level for the interactions, which do not include the main effect .
p is the significance level calculated by the BOOST test
log_or_htn is the logarithm of the odds ratio calculated by the logistic regression on hypertension
p_htn is the significance level calculated by the logistic regression on hypertension
b_dbp is the Beta coefficient estimated by the linear regression on diastolic blood pressure
p_dbp is the significance level calculated by the linear regression on diastolic blood pressure
b_sbp is the Beta coefficient estimated by the linear regression on systolic blood pressure
p_sbp is the significance level calculated by the linear regression on systolic blood pressure
hap1 is the haplotype blocks for snp1
hap2 is the haplotype blocks for snp2
Covariates adjusted in the regression analysis are age, sex, BMI, first 10 principle components
chr1	snp1	chr2	snp2	p	log_or_htn	p_htn	b_dbp	p_dbp	b_sbp	p_sbp	hap1	hap2
4	rs17006507	14	rs1317326	5.88e-12	-2.45856	6.59e-07	-9.517	2.71e-05	-14.5015	0.0001015		hap_94
4	rs17006507	14	rs1891550	6.28e-12	-2.46868	5.82e-07	-9.5643	2.47e-05	-14.6525	8.59e-05		hap_94
2	rs6710248	16	rs2213978	2.31e-11	2.34751	6.73e-10	8.48688	1.48e-07	11.7029	1.08e-05	hap_9
16	rs4843972	22	rs1883110	2.41e-11	0.407601	0.0008776			2.68172	0.01351
3	rs6789594	6	rs57024361	2.46e-11	0.458465	0.0099799	2.6033	0.006935	4.88783	0.00203		hap_41
4	rs4234721	5	rs61606960	2.6e-11	1.34028	2.09e-08	6.23834	1.33e-07	8.70839	7.49e-06
5	rs10463576	9	rs956325	6.22e-11	0.354094	0.0045129
6	rs201225	17	rs887241	8.12e-11	0.294939	0.001434					hap_40
9	rs12555345	10	rs181658	9.03e-11	0.31558	0.002985	1.28693	0.02238	2.26758	0.01423
6	rs201232	17	rs887241	1.02e-10	0.289723	0.0018102					hap_40
3	rs710471	20	rs4812223	1.3e-10	0.310172	0.0274018			2.86979	0.0221
1	rs4553122	11	rs1478637	1.42e-10	0.417223	1.19e-05	1.50989	0.003324	2.52464	0.002813		hap_85
6	rs7752591	12	rs7313458	1.64e-10	-0.654317	6.69e-12	-2.11229	2.47e-05	-4.62952	1.73e-08	hap_48
3	rs6789594	6	rs10949437	2.01e-10	0.485487	0.0067127	2.68999	0.00558	5.08535	0.001414		hap_41
3	rs9842566	8	rs2055050	2.06e-10	-0.701593	8.09e-09	-2.81985	1.23e-05	-5.24745	6.99e-07	hap_15
5	rs10072665	20	rs6084644	2.1e-10	-0.587812	2.34e-10	-3.41136	3.83e-12	-5.43711	1.89e-11	hap_32	hap_112
5	ss66160285	20	rs6084644	2.17e-10	-0.567254	5.68e-10	-3.28186	1.56e-11	-5.1843	9.39e-11	hap_32	hap_112
6	rs6457617	10	rs10733785	2.28e-10	-0.388799	3.84e-05	-2.03371	6.2e-05	-2.79153	0.0008301	hap_42
3	rs4362707	8	rs2055050	2.3e-10	-0.701052	8.2e-09	-2.80121	1.38e-05	-5.24582	7.13e-07	hap_15
5	rs6887620	10	rs11195571	2.37e-10	0.560607	3.78e-09	2.21286	1.36e-05	4.84564	6.2e-09		hap_78
1	rs1281324	10	rs2250543	2.64e-10	-0.741137	1.11e-07	-3.59446	8.24e-07	-5.55386	3.59e-06
5	rs10072665	20	rs1741289	2.86e-10	-0.587221	1.52e-10	-3.17698	7.14e-11	-5.15116	1.41e-10	hap_32	hap_112
6	rs6457620 [	10	rs10733785	2.98e-10	-0.383377	4.98e-05	-1.97228	0.0001019	-2.74116	0.001036	hap_42
2	rs1078100	2	rs2164857	3.03e-10					-2.30679	0.02021		hap_12
3	rs9822040	6	rs10499203	3.27e-10	-2.18479	7.16e-11	-6.67143	3.44e-06	-10.9625	3.24e-06	hap_21
2	rs17045452	2	rs970816	3.28e-10					-1.89767	0.02384		hap_14
11	rs11826859	16	rs10468282	3.29e-10	0.438686	0.0180519	2.70668	0.006535	3.31291	0.04312		hap_102
11	rs11826859	16	rs8054030	3.3e-10	0.440212	0.017555	2.70101	0.006601	3.37192	0.03938		hap_102
3	rs1520703	14	rs8022206	3.31e-10	0.393373	0.0003488	1.55554	0.008473	2.66073	0.005949		hap_96
15	rs1909884	16	rs17284390	3.38e-10	0.779217	9.18e-09	3.58595	3.76e-07	5.45717	2.54e-06
8	rs2385117	12	rs7137567	3.43e-10	0.363765	0.0001649	1.38543	0.007874	2.81477	0.001042	hap_59
13	rs9566086	17	rs853217	3.49e-10	-0.280479	0.015472	-1.84255	0.003196	-2.0161	0.04983		hap_106
11	rs1939810	16	rs3093378	3.66e-10	0.291083	0.0023046	1.20011	0.02049	2.36173	0.005502
8	rs2449818	8	rs4327841	3.67e-10			-0.997472	0.03212
6	rs2095019	10	rs7900818	3.69e-10	0.7973	9.27e-10	3.37166	8.19e-07	4.62189	3.99e-05	hap_52	hap_74
6	rs9504738	11	ss66478800	3.93e-10	-0.677059	0.000293	-3.7608	0.0001467	-4.7771	0.003416	hap_39
11	rs4910353	11	rs7106294	3.94e-10	0.585244	0.0004415	2.14678	0.01396
6	rs11962022	10	rs2457849	3.94e-10	-0.498264	2.18e-07	-2.19838	2.17e-05	-3.19711	0.0001694
7	rs7789417	20	rs984283	3.98e-10	-0.660897	6.88e-07	-2.41955	0.0006655	-4.78504	4.13e-05
10	rs7090707	12	rs17835270	4.1e-10	0.760654	1.47e-06	2.52936	0.001827	4.20445	0.001588
6	rs6910183	10	rs7900818	4.32e-10	0.801687	7.26e-10	3.32289	1.21e-06	4.56143	5.03e-05	hap_52	hap_74
1	rs4553122	11	rs2592908	4.38e-10	0.426256	1.15e-05	1.45279	0.005681	2.81481	0.001093		hap_85
2	rs1213956	14	rs2353730	4.4e-10	0.368075	0.0005596	1.63969	0.004667	2.95515	0.001915
6	rs10485019	14	rs9323058	4.61e-10	-1.29054	1.89e-07	-4.56081	0.0001278	-8.72915	8.04e-06		hap_93
5	rs4590191	20	rs6084644	4.73e-10	-0.563022	7.68e-10	-3.29512	1.32e-11	-5.19085	9.07e-11	hap_32	hap_112
2	rs1078100	2	rs3754993	4.75e-10					-2.28515	0.02137		hap_12
6	rs17500343	11	rs1944730	4.85e-10	0.366811	0.0036171	1.66728	0.01521	3.32804	0.00307
5	rs4590191	20	rs1741289	4.93e-10	-0.574017	2.6e-10	-3.10078	1.54e-10	-5.02483	2.76e-10	hap_32	hap_112
11	rs7109856	14	rs7155359	4.97e-10	-0.783274	3.11e-08	-3.14658	1.92e-05	-5.3474	9.62e-06	hap_79	hap_97
3	rs2603779	8	rs2055050	5.08e-10	-0.691691	1.21e-08	-2.75041	1.94e-05	-5.18982	9.19e-07	hap_15
2	rs6752140	5	rs2547002	5.15e-10	-0.291117	0.0006573	-1.42396	0.002225	-1.90195	0.01293	hap_11
18	rs17688362	22	rs12484954	5.21e-10	-0.410593	0.0002045	-1.31068	0.02871	-2.96737	0.002557
5	ss66160285	20	rs1741289	5.26e-10	-0.572676	2.88e-10	-3.08296	1.99e-10	-4.98061	4.01e-10	hap_32	hap_112
1	rs7515420	13	ss66529567	5.29e-10	0.648022	6.08e-09	2.81657	1.8e-06	4.05377	2.89e-05	hap_4	hap_92
2	rs17711796	12	rs17016574	5.38e-10	1.24036	0.008435	6.11236	0.009166	8.51229	0.02686
5	rs6887620	10	rs4423118	5.38e-10	0.548511	8.38e-09	2.23532	1.16e-05	4.7169	1.65e-08		hap_78
3	rs873845	12	rs10506347	5.39e-10	-0.959017	2.68e-07	-3.5149	0.0004029	-5.52992	0.0007031
2	rs750374	5	rs2547002	5.56e-10	-0.297232	0.0005058	-1.45437	0.00178	-1.9037	0.01282	hap_11
3	rs404801	9	rs529208	5.61e-10	0.399627	4.48e-06	1.8188	0.0001192	2.5681	0.0009476	hap_19
2	rs3769247	5	rs2547002	5.82e-10	-0.369299	3.57e-05	-1.58658	0.001053	-2.24802	0.004734	hap_11
5	rs6887620	10	rs4244297	5.95e-10	0.543518	1.02e-08	2.27906	7.21e-06	4.76118	1.04e-08		hap_78
6	rs9504737	11	ss66478800	5.98e-10	-0.67305	0.0003281	-3.65993	0.0002141	-4.63539	0.004395	hap_39
3	rs10212478	9	rs9406915	6.03e-10	0.443902	3.25e-07	2.00412	1.93e-05	2.99857	0.0001007	hap_19
1	rs17010071	2	rs437866	6.22e-10	1.27324	4.63e-10	4.69632	2.06e-06	6.72014	3.56e-05
2	rs1078100	2	rs1866209	6.41e-10					-2.26564	0.02251		hap_12
4	rs4235144	6	rs9481890	6.41e-10	3.68914	1.08e-09	8.26285	3.83e-05	15.3703	3.04e-06		hap_46
4	rs4235144	6	rs9489622	6.55e-10	3.68918	1.07e-09	8.29117	3.6e-05	15.3989	2.94e-06		hap_46
9	rs914789	17	rs1401539	6.63e-10	-0.642318	5.44e-05	-3.32115	8.79e-05	-5.04501	0.0002787	hap_69
14	rs3742897	16	rs383362	6.65e-10	-0.650995	1.55e-08	-3.20573	1.15e-07	-3.72446	0.000188
2	rs1078100	2	rs998059	6.78e-10					-2.24096	0.02405		hap_12
2	rs1078100	2	rs1866210	6.8e-10					-2.26144	0.02278		hap_12
4	rs11939487	11	rs7125834	7.14e-10	-0.460849	2.35e-05			-2.37248	0.01416	hap_27	hap_80
3	rs17020402	19	rs978052	7.4e-10	0.370106	0.040737
1	rs1851736	12	rs10850162	7.49e-10	-0.550458	1.6e-07	-2.77672	7.66e-07	-3.99834	1.53e-05	hap_2	hap_88
8	rs3176295	15	rs11638057	7.63e-10	0.935116	8.06e-05	4.26388	0.0004267	7.35666	0.0002162
1	rs10912988	1	rs9725124	7.75e-10	-5.64442	4.08e-10	-12.0366	1.03e-05	-18.3594	4.29e-05		hap_7
1	rs11809230	2	rs6432246	7.9e-10	0.800037	1.02e-07	2.93398	0.0001846	6.53824	3.61e-07
2	rs16835140	3	rs7618472	7.96e-10	-0.283991	0.0205625					hap_13
3	rs7652331	7	rs4728224	7.97e-10	-0.373972	0.0012703	-1.72313	0.006147	-3.52168	0.000646
2	rs17045452	2	rs2203733	8.2e-10					-1.77873	0.03398		hap_14
1	rs10912988	1	ss66525526	8.41e-10	-5.64879	4.04e-10	-11.9697	1.17e-05	-18.3085	4.59e-05		hap_7
5	rs17317337	16	rs11076307	8.52e-10	-0.738406	3.08e-11	-2.91653	7.62e-07	-5.21202	7.56e-08		hap_103
11	rs1938961	21	rs363526	8.65e-10	-0.582732	1.92e-10	-1.81099	0.0002198	-3.40445	2.33e-05	hap_83	hap_116
7	rs9642409	22	rs140528	8.69e-10	0.703234	1.18e-07	3.22282	3.77e-06	5.71098	6.08e-07	hap_55
13	rs17316781	14	rs11159104	8.76e-10	0.463818	0.0355777			3.89741	0.0484	hap_91	hap_98
4	rs17025520	11	rs7125834	8.77e-10	-0.461046	2.04e-05			-2.37375	0.01346	hap_27	hap_80
2	rs769951	10	rs11186286	8.85e-10	-0.90332	0.0020105	-4.68953	0.002773	-7.89604	0.002074
1	rs1340401	4	rs1514271	8.96e-10	-1.06765	3.53e-08	-5.1317	1.81e-07	-7.6648	2.13e-06	hap_3
3	rs404801	9	rs9406915	9.08e-10	0.398029	5.13e-06	1.76864	0.0001851	2.67934	0.0005712	hap_19
3	rs10212478	9	rs529208	9.13e-10	0.444122	3.07e-07	2.05575	1.18e-05	3.01096	9.39e-05	hap_19
5	rs292950	5	rs12658564	9.19e-10	-0.343065	0.0017526	-1.3684	0.0204	-2.54155	0.008743		hap_35
12	rs2058798	15	rs3913226	9.38e-10	-4.69374	2.96e-10	-13.7172	4.22e-07	-22.486	4.42e-07
3	rs7626631	6	rs11751354	9.56e-10	-0.427609	0.003317			-3.27241	0.01144
3	rs404801	9	rs10757847	9.71e-10	0.321136	0.0004793	1.52894	0.002097	2.14164	0.00908	hap_19
13	rs9572196	17	rs9905684	9.81e-10	-0.411009	0.0058595						hap_105
2	rs1078100	2	rs4893839	9.96e-10					-2.21044	0.02691		hap_12
16	rs1478703	20	rs742821	9.98e-10	0.710701	6.33e-09	2.67995	3.07e-05	5.07023	1.55e-06
8	rs4397372	10	rs17135529	9.98e-10	0.926849	4.7e-11	4.13948	1.47e-08	6.29515	1.62e-07
2	rs6753258	20	rs2328045	1.02e-09	0.452884	0.0005725
3	rs17030126	12	rs4963931	1.02e-09	-1.30024	6.09e-11	-5.34855	1.33e-07	-8.21855	7.95e-07
2	rs12711674	9	rs867931	1.03e-09	-0.444534	4.81e-06	-2.30668	9.97e-06	-3.16784	0.0002211
2	rs2868435	12	rs879180203	1.03e-09	0.557035	0.0005936	2.53447	0.00371
7	rs17254	10	rs2024183	1.04e-09	0.892307	8.27e-10	2.99042	8.69e-05	6.91126	2.99e-08
