# Supplementary material for: An Exploration of Gene-Gene Interactions and Their Effects on Hypertension
Source: Int J Genomics. 2017 May 31;2017:7208318. doi: 10.1155/2017/7208318 (PMC5470022; doi:10.1155/2017/7208318)
Supplement: Supplementary file 3 [file 7208318.f3.xlsx]

## Sheet: Sheet1
S2 Dataset. Significant GxG interactions during the discovery stage and the confirmatory stage
All pvalues are the significance level for the interactions, which do not include the main effect .
p is the significance level calculated by the BOOST test
log_or_off is the logarithm of the odds ratio calculated by the logistic regression on hypertension in the offspring cohort
p_off_htn is the significance level calculated by the logistic regression on hypertension in the offspring cohort
b_off_dbp is the Beta coefficient estimated by the linear regression on diastolic blood pressure in the offspring cohort
p_off_dbp is the significance level calculated by the linear regression on diastolic blood pressure in the offspring cohort
b_off_sbp is the Beta coefficient estimated by the linear regression on systolic blood pressure in the offspring cohort
p_off_sbp is the significance level calculated by the linear regression on systolic blood pressure in the offspring cohort
log_or_ori is the logarithm of the odds ratio calculated by the logistic regression on hypertension in the original cohort
p_ori_htn is the significance level calculated by the logistic regression on hypertension in the original cohort
b_ori_dbp is the Beta coefficient estimated by the linear regression on diastolic blood pressure in the original cohort
p_ori_dbp is the significance level calculated by the linear regression on diastolic blood pressure in the original cohort
b_ori_sbp is the Beta coefficient estimated by the linear regression on systolic blood pressure in the original cohort
p_ori_sbp is the significance level calculated by the linear regression on systolic blood pressure in the original cohort
freq is the frequency of the minor allele
Covariates adjusted in the regression analysis are age, sex, BMI, first 10 principle components in both cohorts
chr1	snp1	freq1	variant type1	gene1	chr2	snp2	freq2	variant type2	gene2	p	log_or_off	p_off_htn	b_off_dbp	p_off_dbp	b_off_sbp	p_off_sbp	log_or_ori	p_ori_htn	b_ori_dbp	p_ori_dbp	b_ori_sbp	p_ori_sbp
4	rs4235144	0.01464	intron variants	GABRB1	6	rs9481890	0.4912	downstream variant 500B,intron variant	MAN1A1	6.41e-10	3.68914	1.08e-09	8.26285	3.83e-05	15.3703	3.04e-06	16.1179	0.01533			24.1961	0.006687
4	rs4235144				6	rs9489622	0.4934	intron variant	MAN1A1	6.55e-10	3.68918	1.07e-09	8.29117	3.6e-05	15.3989	2.94e-06	16.4293	0.0154525			24.3466	0.006343
12	rs2058798	0.01243	intron variant	LMO3	15	rs3913226	0.1796	outside of gene regions	NPAP1/SNRPN	9.38e-10	-4.69374	2.96e-10	-13.7172	4.22e-07	-22.486	4.42e-07	-16.7153	0.0390886
15	rs1909884	0.3594	intron variant	CHRNA7	16	rs17284390	0.1142	intron variant	CDH13	3.38e-10	0.779217	9.18e-09	3.58595	3.76e-07	5.45717	2.54e-06			2.53979	0.0479
18	rs17688362	0.2052	outside of gene regions	RNA5SP455/KRT8P5	22	rs12484954	0.3909	intron variant	DNAL4	5.21e-10	-0.410593	0.0002045	-1.31068	0.02871	-2.96737	0.002557	-0.564613	0.0057399	-2.02542	0.04364
1	rs17010071				2	rs437866				6.22e-10	1.27324	4.63e-10	4.69632	2.06e-06	6.72014	3.56e-05			-3.33795	0.03112
3	rs873845				12	rs10506347				5.39e-10	-0.959017	2.68e-07	-3.5149	0.0004029	-5.52992	0.0007031			3.16677	0.03758
